# Supplementary material
Source: Royal Society of Chemistry journal article supplement (doi:10.1039/d6gc01404f)
Supplement: d6gc01404f1.pdf [file d6gc01404f1.pdf]

## Supporting information

### **Unlocking Vanadium Diboride As High-Performance Cathodes for Zinc-Ion Batteries**

Yilei He <sup>a,1</sup>, Lehuan Huang <sup>a,1</sup>, Zining Li <sup>a</sup>, Yang Li <sup>a,b,\*</sup>, Liubing Dong <sup>a,\*</sup>

<sup>a</sup> College of Chemistry and Materials Science, Jinan University, Guangzhou 511443, China

<sup>b</sup> School of Materials and Energy, Foshan University, Foshan 528000, China

\* Corresponding author. *Email address:* donglb@jnu.edu.cn

<sup>1</sup> These two authors contributed equally to this work.

#### **1. Experimental section**

##### **1.1 Synthesis of VB<sub>2</sub> and EA-VB<sub>2</sub> cathode**

The VB<sub>2</sub> cathode was obtained by mixing 12.56 mg of VB<sub>2</sub> powder and 157 mg of CNT aqueous slurry (Model: NTP2021; Shenzhen Nanotech Port Co., Ltd. The multi-walled CNTs were produced by chemical vapour deposition method, and they possess a length of 5~15 μm and diameter of 15~25 nm) in 100 ml of deionized water and then ultrasonically mixing for 10 min to form a homogeneous suspension. The VB<sub>2</sub> electrode was prepared by vacuum filtration of the VB<sub>2</sub>-CNT slurry, which did not contain any collector, binder, or conductive additives. Subsequently, the electrode was dried under vacuum conditions for 12 h until it was ready for use. The mass loading of VB<sub>2</sub> in the electrode was 1.0 mg/cm<sup>2</sup>. To enhance the electrochemical performance of VB<sub>2</sub> cathodes, the cathodes underwent an electrochemical activation treatment as follows: they were charged to 1.8 V at a high current density of 5 A/g and maintained at this voltage for 3 h. After the charging process, EA-VB<sub>2</sub> electrodes with higher electrochemical activity were obtained. By varying the charging voltage and constant voltage duration, VB<sub>2</sub> cathodes with different electrochemical performances can be achieved.

##### **1.2 Materials characterization**

The micro-morphology of materials was observed by scanning electron microscopy (SEM, model: Sigma 300) and high-resolution transmission electron microscopy (HRTEM, model: FEI Tecnai G2 F20). X-ray diffraction (XRD) patterns were obtained on an X-ray diffractometer (Miniflex 600) using Cu Kα (λ=1.5406 Å) as the source of radiation. The elemental composition of the sample surface was analyzed by X-ray photoelectron

spectroscopy (XPS, model: Thermo Scientific K-Alpha), and Laser Raman spectroscopy (model: Lab RAM HRE volution equipped with 532 nm laser excitation).

### 1.3 Electrochemical measurement

The EA-VB<sub>2</sub> cathode can be directly used as binder-free working electrodes for rechargeable aqueous zinc-based batteries. CR2032 coin cells were assembled by using the EA-VB<sub>2</sub> cathode, Zn foil anode, glass fiber separator, and 2 M ZnSO<sub>4</sub> aqueous electrolyte. Cyclic voltammetry (CV) was recorded on a Bio-Logic VSP-300 electrochemical workstation. The relationship between the scan rate  $\nu$  and the redox peak current can be described by the following equation,

$$i = a\nu^b \quad (\text{S1})$$

the  $b$ -value is a constant ranging from 0.5 to 1.0, where capacitive-controlled processes are characterized by  $b = 1.0$ , while diffusion-controlled processes are characterized by  $b = 0.5$ . Based on these  $b$ -values, the relative contributions of diffusion and capacitive processes can be quantified using the equations,

$$i = k_1\nu + k_2\nu^{1/2} \quad (\text{S2})$$

where  $k_1$  represents the capacitive contribution and  $k_2$  represents the diffusion-controlled faradaic insertion contribution. The galvanostatic charge-discharge (GCD) tests, cycling tests, galvanostatic intermittent titration technique (GITT) were also performed on a LAND CT2001A battery-testing system. During the GITT measurements, a current of 0.5 A/g was adopted for 10 min and a pulse of 30 min was applied to collect the potential response. The energy density was directly calculated by integrating the GCD profiles, as expressed using the following formula:

$$E = \int C \times U \quad (\text{S3})$$

where  $E$  is the energy density (Wh/kg),  $C$  is the specific capacity (mAh/g) and  $U$  is the voltage (V) in the GCD profiles. Note that the energy density was calculated based on the activate material mass of the cathodes, as widely did in the field of ZIBs, considering the excessive mass of the zinc anodes. The zinc-ion diffusion coefficient ( $D_{\text{Zn}^{2+}}$ ) was calculated based on:

$$D_{\text{Zn}^{2+}} = \frac{4L^2}{\pi\tau} \left( \frac{\Delta E_s}{\Delta E_\tau} \right)^2 \quad (\text{S4})$$

where the  $L$ ,  $\tau$ ,  $\Delta E_s$ , and  $\Delta E_\tau$  correspond to the thickness of the cathode (cm), the relaxation time (s), the steady state voltage (V) and voltage change (V) during the charge-discharge

process, respectively. CV and electrochemical impedance spectroscopy (EIS) tests were recorded on a Bio-Logic VSP-300 electrochemical workstation, with a frequency range of 0.1-100.0 kHz by applying a disturbance amplitude of 5 mV.

#### **1.4 Computational methods**

In order to study the diffusion of Zn-ion in crystalline VB<sub>2</sub>, we have performed density functional theory (DFT) calculations using the Vienna *ab initio* Simulation Package (VASP).<sup>[S1,S2]</sup> The projector augmented wave (PAW) method and Perdew-Burke-Ernzerhof (PBE) functional were used throughout the work.<sup>[S3,S4]</sup> The kinetic cutoff energy was 500 eV and GAMMA-centered *k*-point mesh to 9×9×9 for the geometric relaxation and electronic structure calculations. Structural optimization of ground states was performed by allowing the lattice parameters and atomic positions to relax until the maximum force on each atom was less than 0.01 eV/Å. To investigate the zinc-ion occupation and migration behaviors, the binding energy of zinc-ions at the interstitial site within the VB<sub>2</sub> lattice was systematically calculated. The energy was obtained by evaluating the total energy differences between configurations with and without zinc intercalation at specific positions. The simulation box contains a 3×3×4 supercell with 108 atoms in total. The climbing-image nudged-elastic-band (CI-NEB) method was employed to search for minimum energy paths (MEP).<sup>[S5,S6]</sup> In the CI-NEB calculations, the mesh is 3×3×3, five images were utilized, and the atomic force was set to 0.05 eV/Å.

## 2. Supporting Figures and Tables

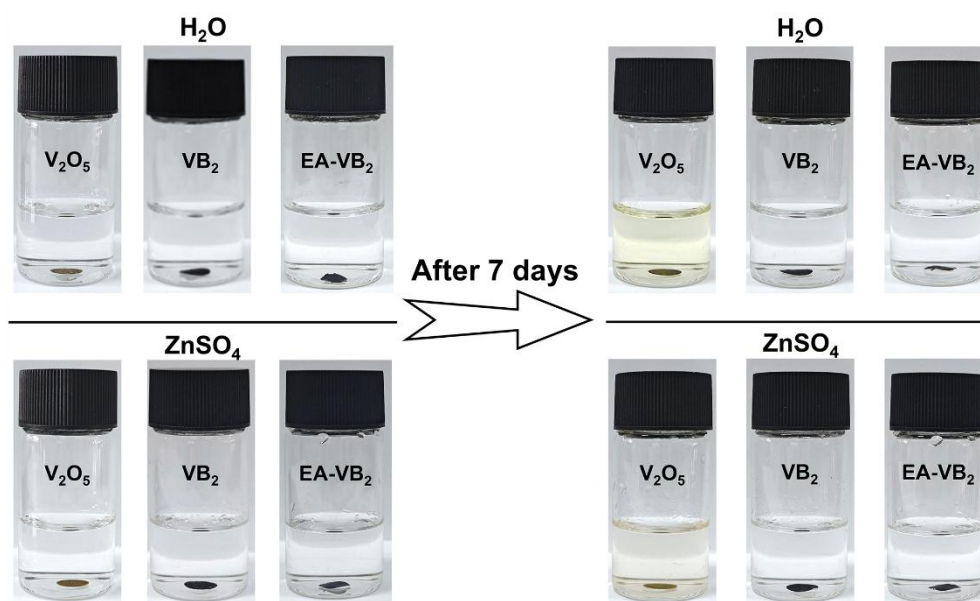

**Figure S1.** Spontaneous dissolution tendency tests of the  $V_2O_5$ ,  $VB_2$  and  $EA-VB_2$  cathodes in water and 2 M  $ZnSO_4$  electrolyte. For the  $V_2O_5$  cathode, the vanadium dissolution issue is clearly observed since the solutions turn from transparent to yellow. In contrast, the  $VB_2$  and  $EA-VB_2$  cathode materials do not show obvious vanadium dissolution, as reflected by the almost unchanged color of the solutions after the cathodes were soaked for 7 days.

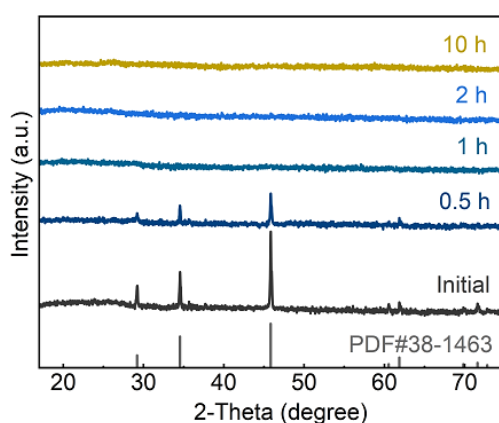

**Figure S2.** XRD patterns of the  $EA-VB_2$  material obtained by electrochemically activating the pristine  $VB_2$  at a constant voltage of 1.8 V for different activation times.

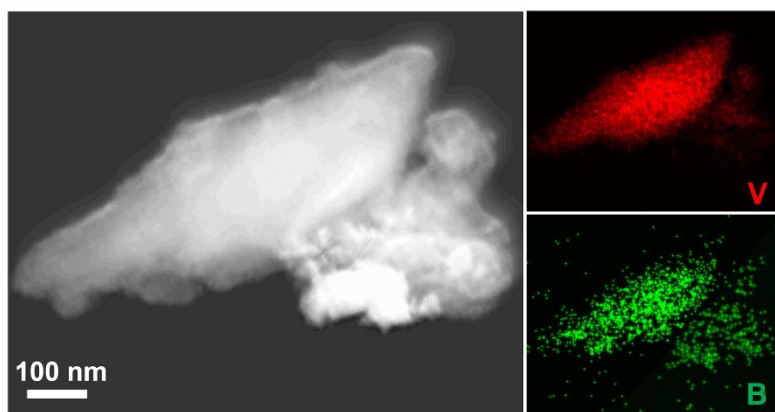

**Figure S3.** TEM-EDS elemental mapping images of the pristine  $\text{VB}_2$  material.

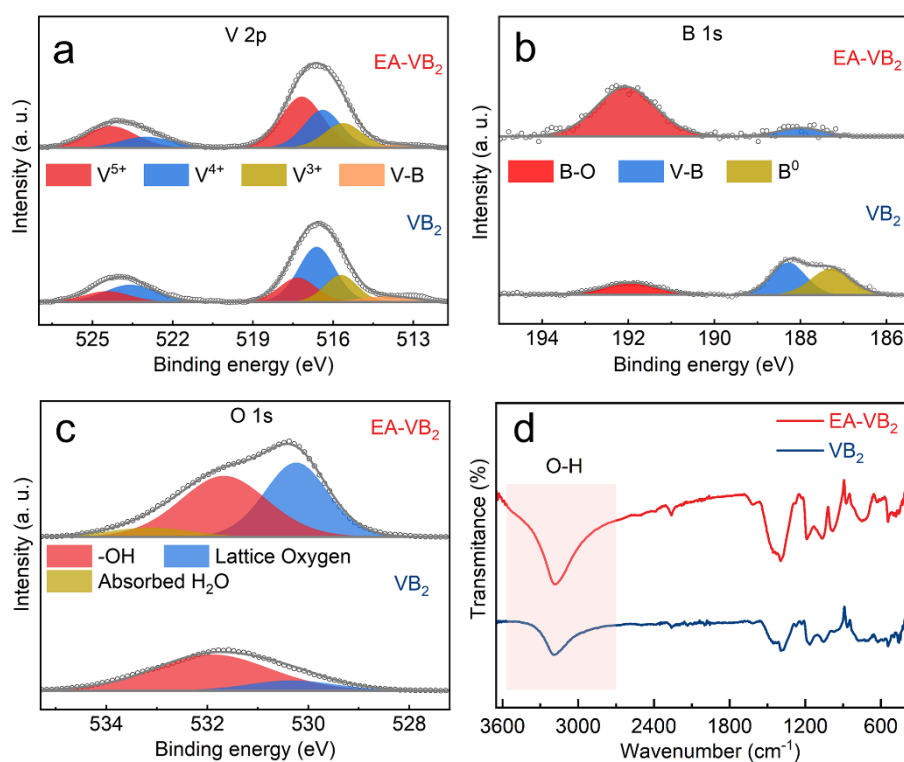

**Figure S4.** High-resolution XPS spectra of (a) V 2p, (b) B 1s, (c) O 1s and (d) FTIR spectra of the  $\text{VB}_2$  and  $\text{EA-VB}_2$  cathodes.

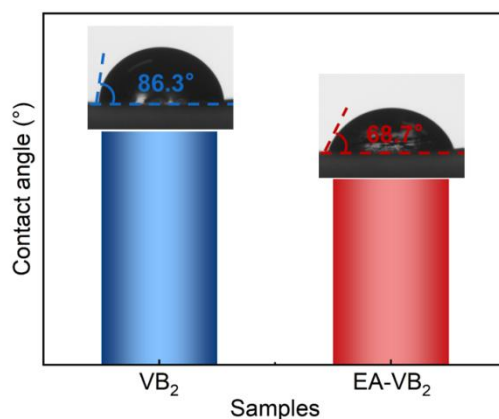

**Figure S5.** Contact angles of the  $\text{VB}_2$  and  $\text{EA-VB}_2$  cathodes.

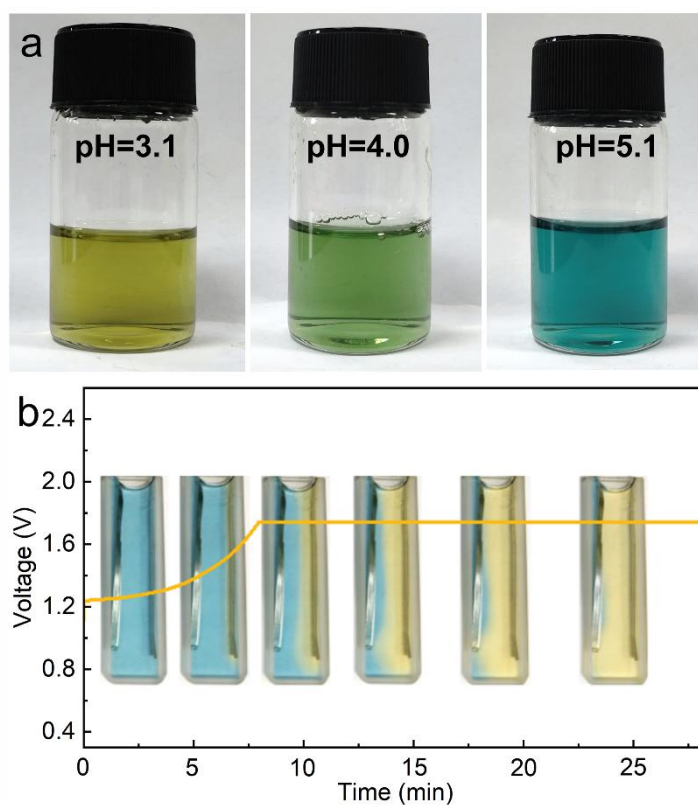

**Figure S6.** (a) The color of bromocresol green-containing 2 M  $\text{ZnSO}_4$  electrolytes at different pH values. The initial pH of the 2 M  $\text{ZnSO}_4$  electrolyte is 4.0, while the electrolytes with pH values of 3.1 and 5.1 were obtained by adding HCl or NaOH, respectively. The volume fraction of bromocresol green in the 2 M  $\text{ZnSO}_4$  electrolyte is 0.6%. (b) pH variation of the electrolyte near the  $\text{VB}_2$  cathode during the electrochemical activation process (the left and the right electrodes are zinc anode and the  $\text{VB}_2$  cathode, respectively).

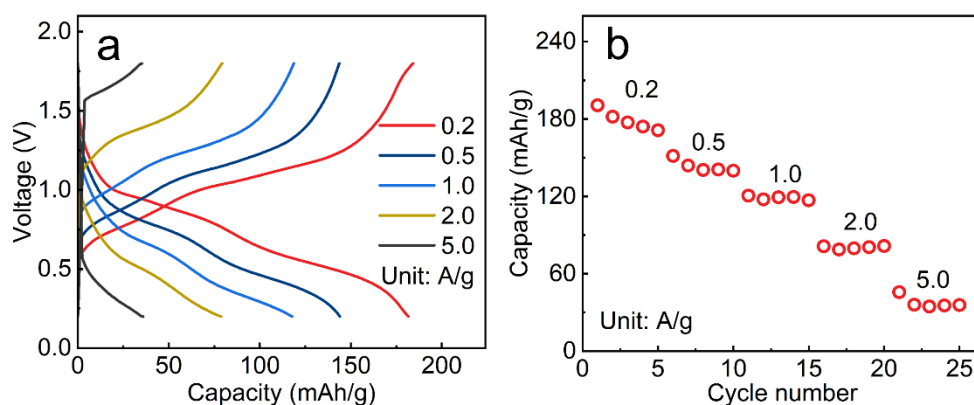

**Figure S7.** (a) GCD profiles and (b) rate performance of the EA-VB<sub>2</sub> cathodes (electrochemically activated in 0.1 M Zn(CF<sub>3</sub>SO<sub>3</sub>)<sub>2</sub>/acetonitrile organic electrolyte). The electrochemical performance tests were performed in 2 M ZnSO<sub>4</sub> aqueous electrolyte.

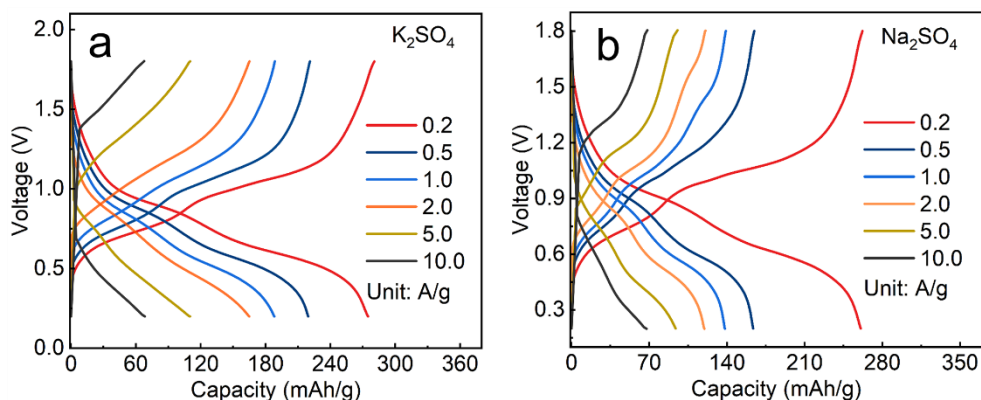

**Figure S8.** GCD profiles of the VB<sub>2</sub> cathodes after electrochemical activation in different electrolytes: (a) 0.5 M K<sub>2</sub>SO<sub>4</sub>; (b) 2 M Na<sub>2</sub>SO<sub>4</sub>. Note that the electrochemical activation was performed in the system with the pristine VB<sub>2</sub> cathode, activated carbon fiber (ACF) anode and the K<sub>2</sub>SO<sub>4</sub> (or Na<sub>2</sub>SO<sub>4</sub>) electrolyte. After the activation process, the cathode was assembled into ZIBs with 2 M ZnSO<sub>4</sub> electrolyte for the above electrochemical tests.

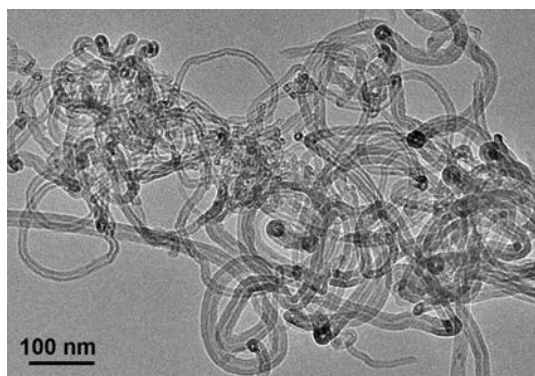

**Figure S9.** TEM image of the CNT raw-material.

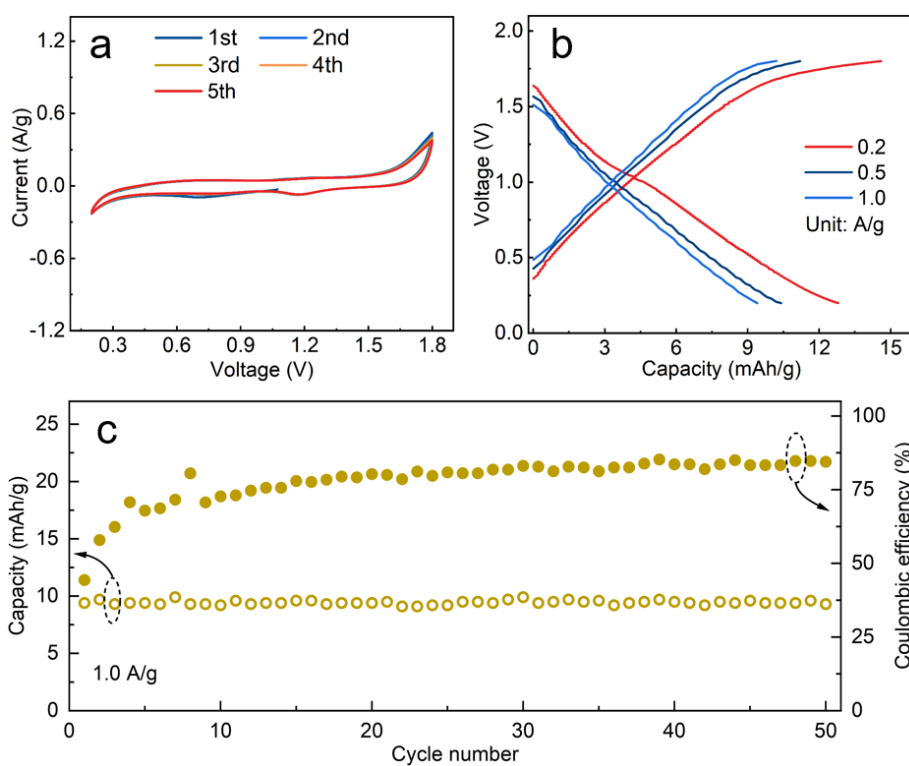

**Figure S10.** (a) CV curves at 1 mV/s, (b) GCD profiles and (c) cycling performance of the CNT cathode.

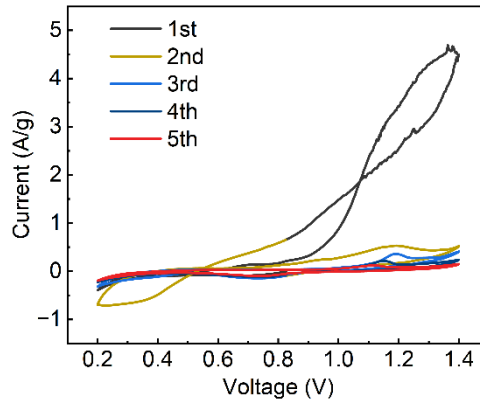

**Figure S11.** CV curves of the pristine VB<sub>2</sub> cathode at 1 mV/s.

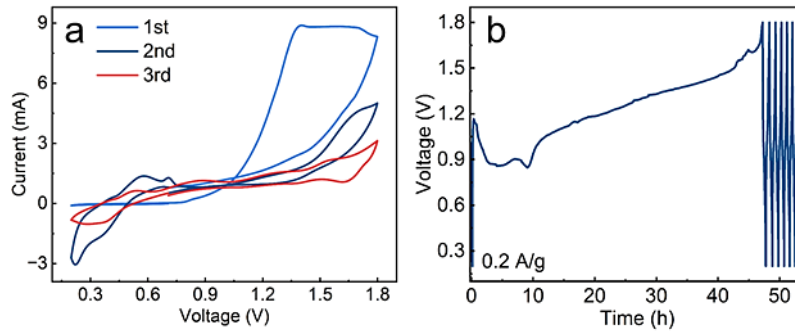

**Figure S12.** The electrochemical behavior of the pristine VB<sub>2</sub> cathode within the working voltage window of 0.2-1.8 V: (a) CV curves at 1 mV/s and (b) GCD profiles at 0.2 A/g. The CV curves present poor reversibility of the pristine VB<sub>2</sub> within 0.2-1.8 V, as consistent with the serious side reaction at the first charge process during the GCD tests, negatively affecting the cycling performance of the ZIBs. Even after the first charge/discharge cycle, its capacity (91 mAh/g at 0.2 A/g) is much inferior to the EA-VB<sub>2</sub> cathode synthesized by electrochemical activation.

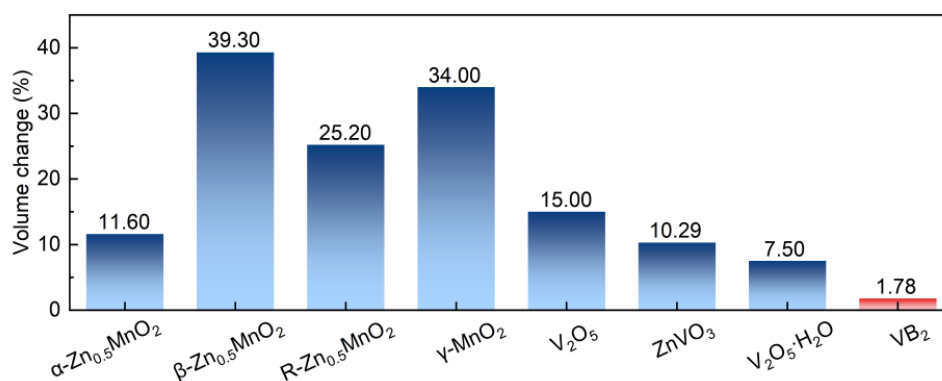

**Figure S13.** Zn<sup>2+</sup> insertion-caused volume change comparison between the VB<sub>2</sub> and various reported cathode materials.<sup>[S7-S10]</sup>

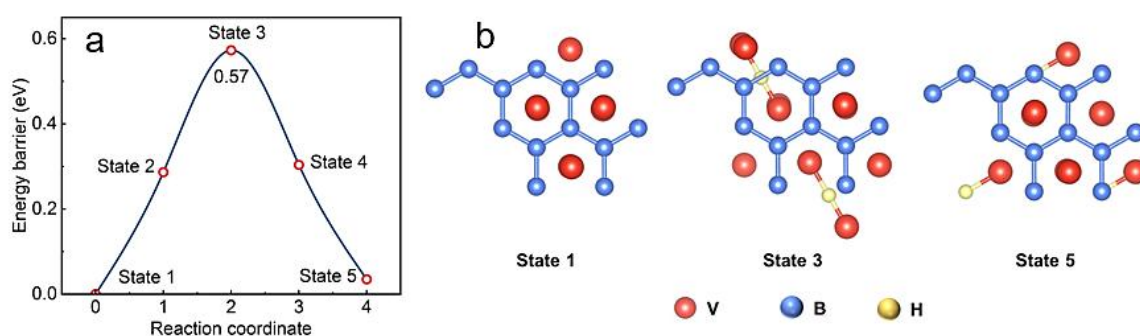

**Figure S14.** (a) Energy barriers and (b) corresponding crystal structures for the H<sup>+</sup> diffusion in the VB<sub>2</sub> cathode.

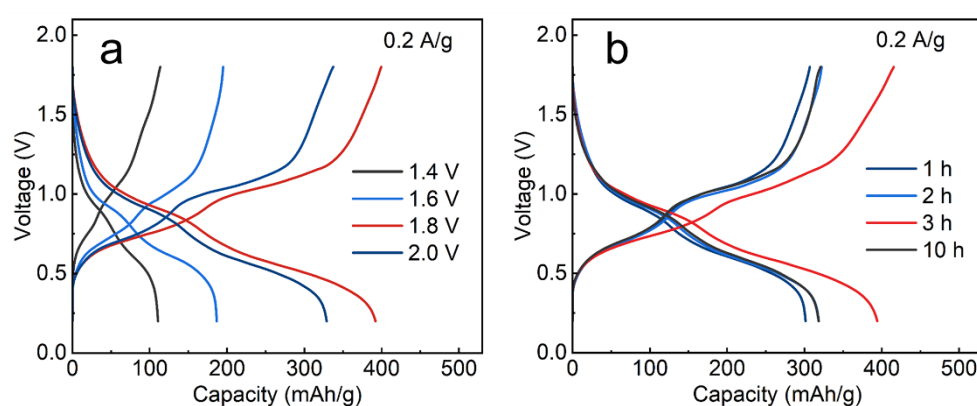

**Figure S15.** (a) GCD profiles of the EA-VB<sub>2</sub> cathodes synthesized under various electrochemical activation conditions: (a) different activation voltages from 1.4 to 2.0 V (activation time is 3 h); (b) different activation times from 1 to 10 h (activation voltage is 1.8 V).

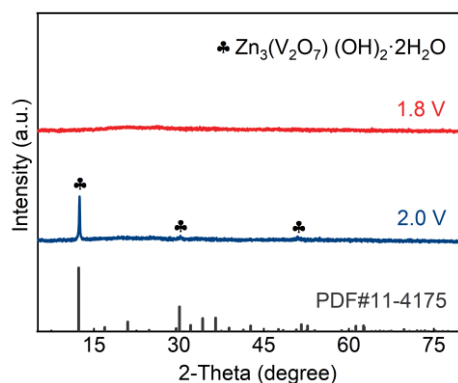

**Figure S16.** XRD patterns of the EA-VB<sub>2</sub> cathode synthesized under the electrochemical activation voltage of 1.8 and 2.0 V. Once the electrochemical activation voltage reaches 2.0 V, a new V-based oxide, zinc pyrovanadate ( $\text{Zn}_3(\text{V}_2\text{O}_7)(\text{OH})_2 \cdot 2\text{H}_2\text{O}$ , PDF#11-4175), forms on the EA-VB<sub>2</sub> cathode. As pointed out in the previous research,<sup>[S11,S12]</sup> the  $\text{Zn}^{2+}$ -storage capacity of zinc pyrovanadate is lower than 150 mAh/g.

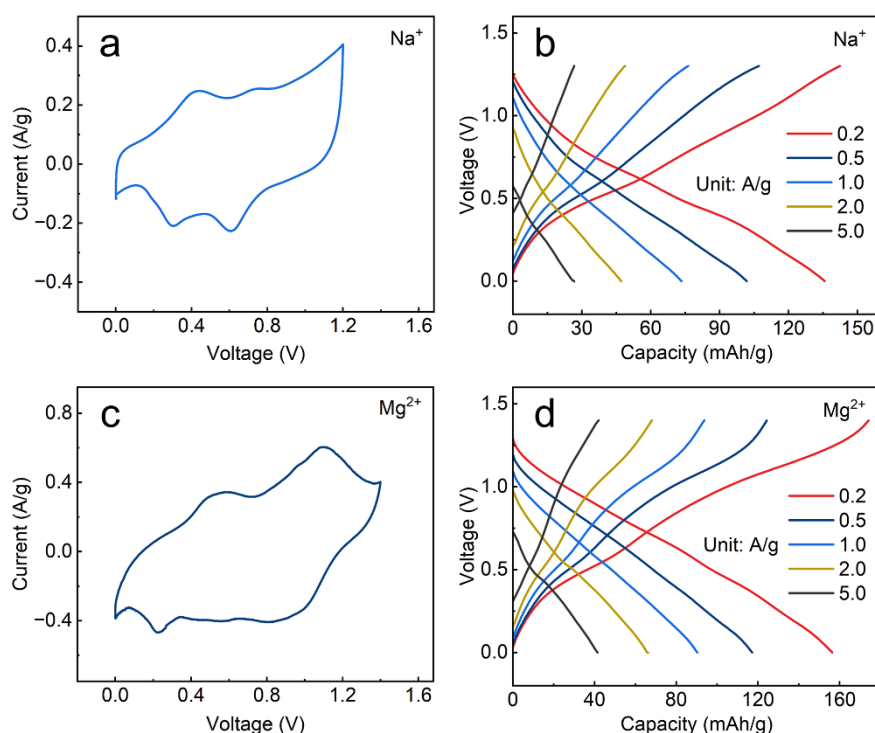

**Figure S17.** The CV curves at 1 mV/s and GCD profiles of the hybrid capacitors with the EA-VB<sub>2</sub> cathode and the ACF anode in (a-b) 2 M Na<sub>2</sub>SO<sub>4</sub> and (c-d) 2 M MgSO<sub>4</sub> aqueous electrolytes.

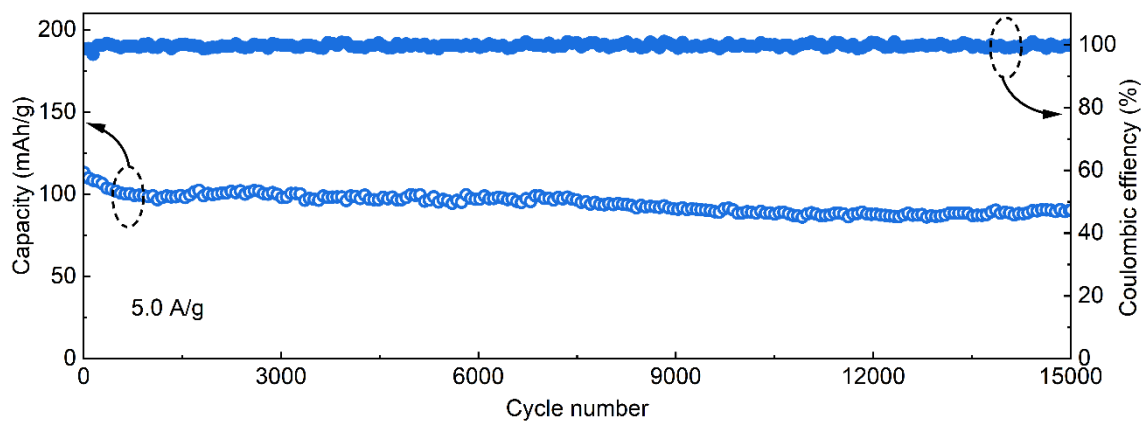

**Figure S18.** Cycling stability of the EA-VB<sub>2</sub> cathode-based zinc-ion hybrid supercapacitors.

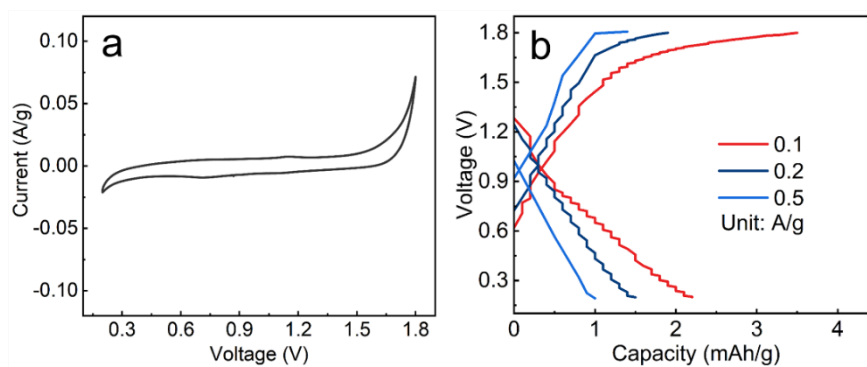

**Figure S19.** (a) CV curve at 1 mV/s and (b) GCD profiles at various current densities of B<sub>2</sub>O<sub>3</sub> cathode in 2 M ZnSO<sub>4</sub> aqueous electrolyte. B<sub>2</sub>O<sub>3</sub> shows poor electrochemical activity.

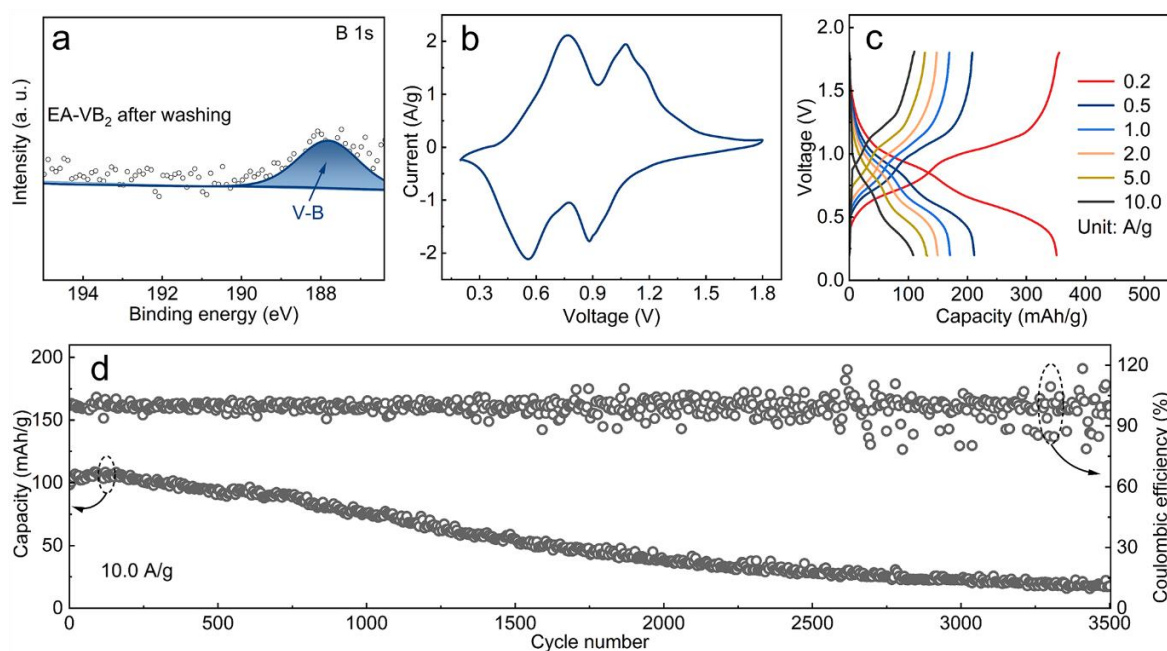

**Figure S20.** (a) B 1s XPS spectrum, (b) CV curve at 1 mV/s, (c) GCD profiles and (d) cycling performance of the EA-VB<sub>2</sub> cathode after washing with ethanol to remove the B<sub>2</sub>O<sub>3</sub> component. From the XPS analysis, the characteristic peaks of B<sup>3+</sup> disappear, proving that B<sub>2</sub>O<sub>3</sub> has been successfully washed away because boron oxides are readily soluble in ethanol. The operating voltage window, redox peaks, and capacity at various current densities change slightly before and after the removal of the B<sub>2</sub>O<sub>3</sub> component from the EA-VB<sub>2</sub> cathode, indirectly demonstrating that the B<sub>2</sub>O<sub>3</sub> component does not participate in the ion-storage redox reactions. However, the cycling performance deteriorates significantly once the B<sub>2</sub>O<sub>3</sub> component is removed, which illustrates the positive role of the B<sub>2</sub>O<sub>3</sub> in stabilizing the structure of the EA-VB<sub>2</sub> cathode.

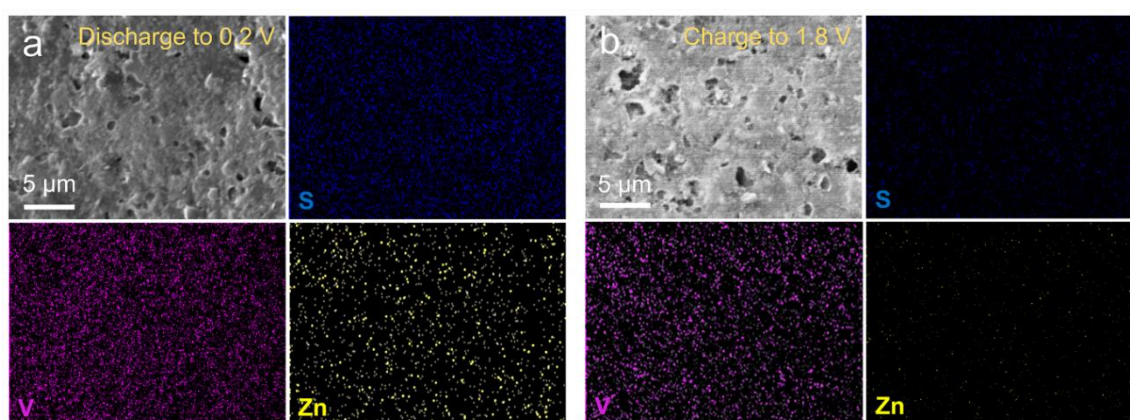

**Figure S21.** SEM-EDS elemental mapping images of the EA-VB<sub>2</sub> cathode at (a) fully discharged and (b) charged states. The cathodes were washed with 0.1 M HCl aqueous solution to eliminate the interference from Zn<sub>4</sub>SO<sub>4</sub>(OH)<sub>6</sub>·5H<sub>2</sub>O by-product before the SEM-EDS

analysis.

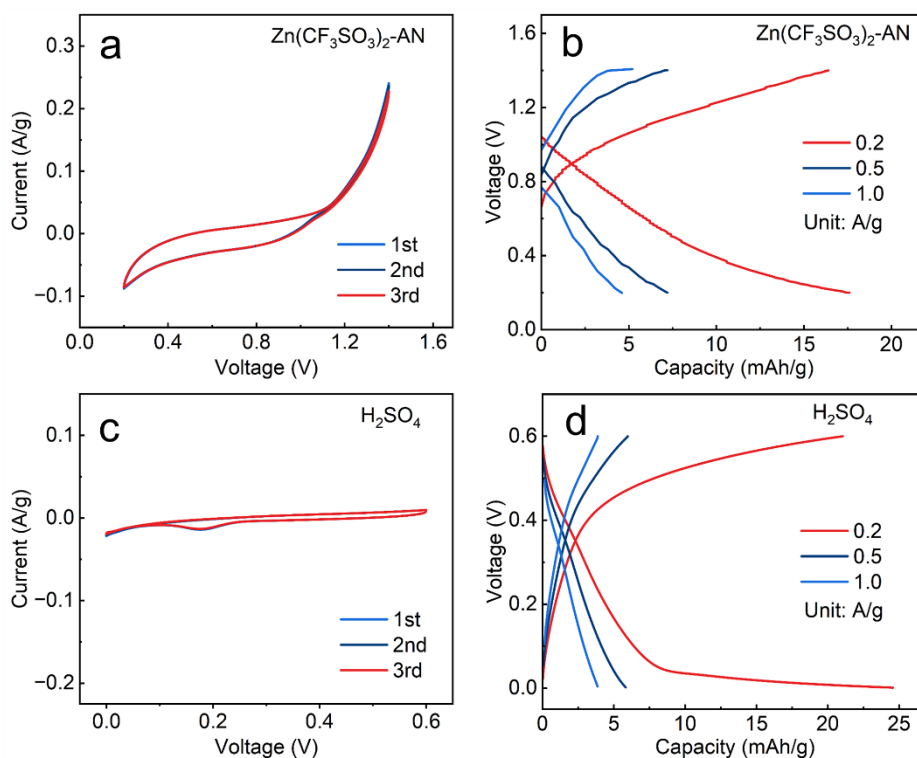

**Figure S22.** (a) CV curves at 1 mV/s and (b) GCD profiles of the VB<sub>2</sub> cathode in H<sup>+</sup>-free Zn(CF<sub>3</sub>SO<sub>3</sub>)<sub>2</sub>/AN electrolyte. (c) CV curves at 1 mV/s and (d) GCD profiles of the VB<sub>2</sub> cathode in Zn<sup>2+</sup>-free H<sub>2</sub>SO<sub>4</sub> aqueous electrolyte.

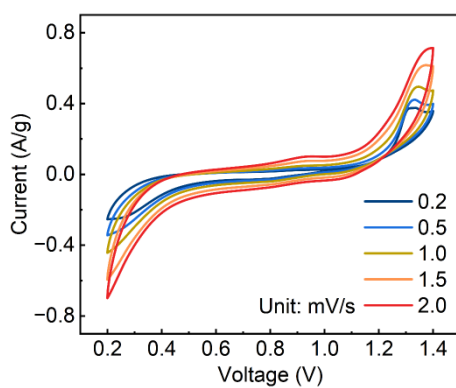

**Figure S23.** CV curves of the VB<sub>2</sub> cathode.

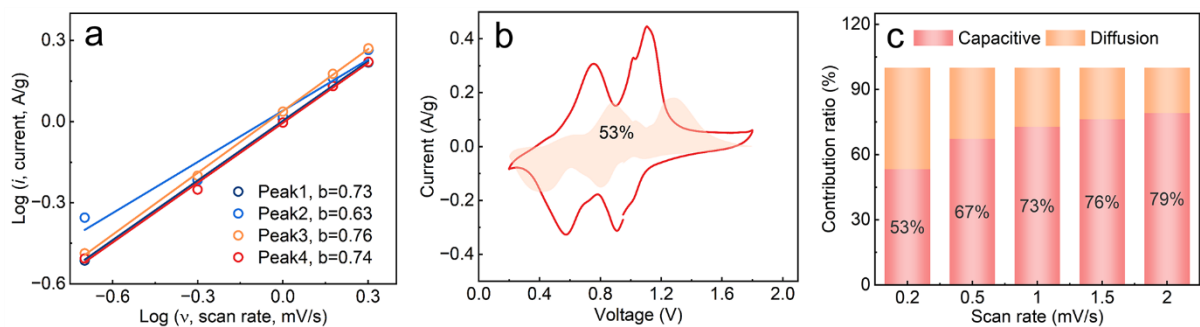

**Figure S24.** (a) Log ( $i$ ) versus log ( $v$ ) plots, (b) CV curves with capacitive contribution at 0.2 mV/s, and (c) capacitive contribution ratios at various sweep rates for the EA-VB<sub>2</sub> cathode.

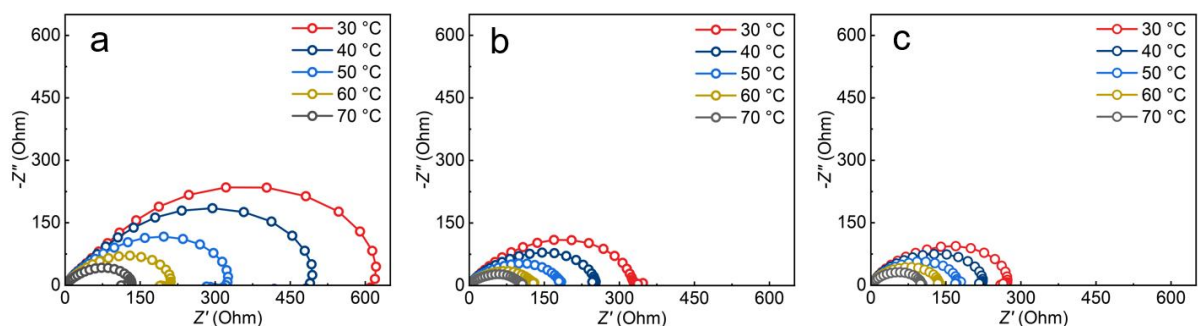

**Figure S25.** EIS spectra measured at various temperatures of the Zn//Zn symmetric cells using different separators: (a) CNF separator, (b) CNF@VB<sub>2</sub> separator and (c) CNF@EA-VB<sub>2</sub> separator.

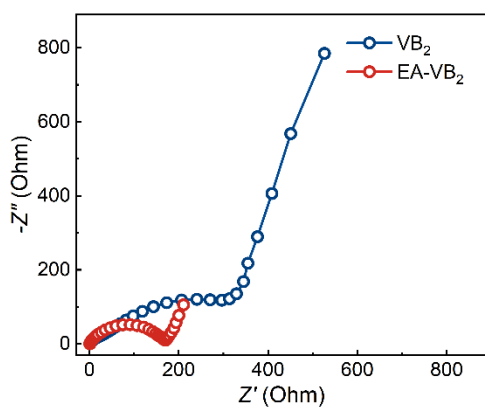

**Figure S26.** EIS spectra of the VB<sub>2</sub> and EA-VB<sub>2</sub> cathodes.

**Table S1.** Comparison of the electrochemical performance for the EA-VB<sub>2</sub> and some representative cathodes in ZIBs

| Cathode                                                        | Electrolyte                                                                                                     | Voltage windows (V) | Specific capacity (mAh/g) | Cycle performance                  | Ref.      |
|----------------------------------------------------------------|-----------------------------------------------------------------------------------------------------------------|---------------------|---------------------------|------------------------------------|-----------|
| EA-VB <sub>2</sub>                                             | 2 M ZnSO <sub>4</sub>                                                                                           | 0.2-1.8             | 398.0 (0.2 A/g)           | 99.0% after 3500 cycles (10.0 A/g) | This work |
| TPA-V <sub>10</sub>                                            | 3 M Zn(CF <sub>3</sub> SO <sub>3</sub> ) <sub>2</sub>                                                           | 0.2-1.8             | 324.9 (0.1 A/g)           | 98.6% after 600 cycles (2.0 A/g)   | [S13]     |
| 2D MnO/C                                                       | 3 M ZnSO <sub>4</sub> + 0.1 M MnSO <sub>4</sub>                                                                 | 0.8-1.8             | 210.0 (0.1 A/g)           | 90.0% after 900 cycles (0.5 A/g)   | [S14]     |
| HCN@MoS <sub>2</sub>                                           | 3 M Zn(OTf) <sub>2</sub>                                                                                        | 0.6-1.6             | 328.0 (1.0 A/g)           | 83.6% after 4000 cycles (0.1 A/g)  | [S15]     |
| RuO <sub>2</sub> QDs@PCNCs                                     | 2 M ZnSO <sub>4</sub>                                                                                           | 0.4-1.8             | 224.0(0.2 A/g)            | 69.4% after 2000 cycles (1.0 A/g)  | [S16]     |
| A-VOP/G                                                        | 1 M Zn(CF <sub>3</sub> SO <sub>3</sub> ) <sub>2</sub> + 21 M LiN(CF <sub>3</sub> SO <sub>2</sub> ) <sub>2</sub> | 0.8-2.1             | 168.4 (0.1 A/g)           | 87.7% after 1000 cycles (1.0 A/g)  | [S17]     |
| VS <sub>2</sub> /Ti <sub>3</sub> C <sub>2</sub> T <sub>z</sub> | 1 M ZnSO <sub>4</sub>                                                                                           | 0.0-1.3             | 285.0 (0.2 A/g)           | 74.3% after 5000 cycles (2.0 A/g)  | [S18]     |
| Cu-Bi <sub>2-x</sub> Se <sub>3</sub>                           | 1 M ZnSO <sub>4</sub>                                                                                           | 0.2-1.6             | 320.0 (0.1 A/g)           | 71.6% after 4000 cycles (10.0 A/g) | [S19]     |
| VS-450                                                         | 2 M ZnSO <sub>4</sub>                                                                                           | 0.4-1.5             | 370.0 (0.1 A/g)           | 83.6% after 1000 cycles (0.1 A/g)  | [S20]     |
| Cu-TBPQ MOF                                                    | 3 M Zn(CF <sub>3</sub> SO <sub>3</sub> ) <sub>2</sub>                                                           | 0.2-1.5             | 209.3 (0.1 A/g)           | 88.0% after 5000 cycles (2.0 A/g)  | [S21]     |
| PMVO-sl <sub>s</sub>                                           | 2.8 M Zn(CF <sub>3</sub> SO <sub>3</sub> ) <sub>2</sub> + 0.2 M ZnSO <sub>4</sub>                               | 0.2-1.8             | 329.0 (0.2 A/g)           | 85.0% after 100 cycles (0.2 A/g)   | [S22]     |
| DOP                                                            | 2 M Zn(ClO <sub>4</sub> ) <sub>2</sub>                                                                          | 0.3-1.5             | 336.0 (0.1 A/g)           | 85.0% after 2000 cycles (1.0 A/g)  | [S23]     |
| p-CD                                                           | 2.5 M Zn(CF <sub>3</sub> SO <sub>3</sub> ) <sub>2</sub>                                                         | 0.2-1.6             | 237.0 (0.1 A/g)           | 90.8% after 1000 cycles (1.0 A/g)  | [S24]     |
| 11e- $\alpha$ -MnO <sub>2</sub>                                | 2 M ZnSO <sub>4</sub> + 0.2 M MnSO <sub>4</sub>                                                                 | 0.8-1.8             | 332.8 (0.1 A/g)           | 85.0% after 2000 cycles (1.0 A/g)  | [S25]     |
| V <sub>d</sub> -NVO                                            | 2 M ZnSO <sub>4</sub>                                                                                           | 0.4-1.5             | 371.0 (0.1 A/g)           | 81.7% after 1000 cycles (5.0 A/g)  | [S26]     |

|                          |                                                 |         |                 |                                   |       |
|--------------------------|-------------------------------------------------|---------|-----------------|-----------------------------------|-------|
| MoS <sub>2</sub> /MWCNTs | 2 M ZnSO <sub>4</sub>                           | 0.2-1.0 | 216.1 (0.1 A/g) | 74.0% after 1000 cycles (3.0 A/g) | [S27] |
| δ-MnO <sub>2</sub>       | 2 M ZnSO <sub>4</sub> + 0.2 M MnSO <sub>4</sub> | 0.8-1.8 | 308.0 (0.1 A/g) | 66.7% after 600 cycles (1.0 A/g)  | [S28] |

## References

- [S1] G. Kresse, J. Furthmüller, *Comp. Mater. Sci.* 1996, **6**, 15.
- [S2] G. Kresse, J. Furthmüller, *Phys. Rev. B* 1996, **54**, 11169.
- [S3] J. Perdew, K. Burke, M. Ernzerhof, *Phys. Rev. Lett.* 1996, **77**, 3865.
- [S4] G. Kresse, D. Joubert, *Phys. Rev. B* 1999, **59**, 1758.
- [S5] G. Henkelman, B. Uberuaga, H. Jónsson, *J. Chem. Phys.* 2000, **113**, 9901.
- [S6] D. Sheppard, P. Xiao, W. Chemelewski, D. Johnson, G. Henkelman, *J. Chem. Phys.* 2012, **136**, 074103.
- [S7] T. Li, N. Zhang, B. Liu, P. Wang, Z. Liu, Y. Wang, D. Xu, H. Tian, Q. Zhang, T. Yi, *Adv. Funct. Mater.* 2025, **35**, 2423755.
- [S8] T. Juran, J. Young, M. Smeu, *J. Phys. Chem. C* 2018, **122**, 8788.
- [S9] T. Wu, K. Zhu, C. Qin, K. Huang, *J. Mater. Chem. A* 2019, **7**, 5612.
- [S10] H. Zhang, F. Ning, Y. Guo, S. Subhan, X. Liu, S. Shi, S. Lu, Y. Xia, J. Yi, *ACS Energy Lett.* 2024, **9**, 4761.
- [S11] C Xia, J Guo, Y Lei, H Liang, C Zhao, H Alshareef, *Adv. Mater.* 2018, **30**, 1705580.
- [S12] C. Yuan, H. Liu, L. Liu, S. Fan, Z. Chen, H. Wang, W. Peng, Y. Li, Q. Zhang, X. Fan, *Adv. Energy Mater.* 2026, **16**, e04549.
- [S13] X. Dan, X. Yin, J. Ba, J. Li, Y. Cheng, F. Duan, Y. Wei, Y. Wang, *Nano Lett.* 2024, **24**, 6881.
- [S14] Z. Zhu, Z. Lin, Z. Sun, P. Zhang, C. Li, R. Dong, H. Mi, *Rare Metals* 2022, **41**, 3729.
- [S15] C. Kang, J. Park, G. Kim, K. Ko, S. Son, *ACS Appl. Mater. Interfaces* 2023, **15**, 7887.
- [S16] X. Han, X. Kong, D. Wang, X. Li, L. Dong, *Chem. Eng. J.* 2023, **477**, 147078.
- [S17] J. Jiang, Y. Huang, Z. Fan, Y. Cui, X. Liu, X. Wang, *Chem. Commun.* 2025, **61**, 6190.
- [S18] L. Zhang, Y. Li, X. Liu, R. Yang, J. Qiu, J. Xu, B. Lu, J. Rosen, L. Qin, J. Jiang, *Adv. Sci.* 2024, **11**, 2401252.
- [S19] Y. Zong, H. Chen, J. Wang, M. Wu, Y. Chen, L. Wang, X. Huang, H. He, X. Ning, Z. Bai, W. Wen, D. Zhu, X. Ren, N. Wang, S. Dou, *Adv. Mater.* 2023, **35**, 2306269.
- [S20] K. Lolupiman, C. Yang, P. Woottapanit, W. Sukmas, W. Limphirat, N. Rodthongkum, X.

- Zhang, G. He, J. Qin, *Adv. Funct. Mater.* 2025, **35**, e24100.
- [S21] J. Liu, Y. Zhou, G. Xing, M. Qi, Z. Tang, O. Terasaki, L. Chen, *Adv. Funct. Mater.* 2024, **34**, 2312636.
- [S22] Q. He, J. Bai, Y. Liao, H. Wang, L. Chen, *Chem. Eng. J.* 2024, **485**, 149893.
- [S23] K. Hua, Q. Ma, Y. Liu, P. Xiong, R. Wang, L. Yuan, J. Hao, L. Zhang, C. Zhang, *ACS Nano* 2025, **19**, 14249.
- [S24] T. Song, Q. Ma, B. Wang, X. Zhang, Y. Wang, H. Xiong, *Angew. Chem. Int. Edit.* 2025, **64**, e202503655.
- [S25] Y. Ding, C. Cai, L. Ma, J. Wang, M. Mercer, J. Liu, D. Kramer, X. Yu, D. Xue, C. Zhi, C. Peng, *Adv. Energy Mater.* 2025, **15**, 2402819.
- [S26] S. Yao, Y. Sun, L. Pan, *Appl. Surf. Sci.* 2024, **672**, 160785.
- [S27] H. Shuai, R. Liu, W. Li, X. Yang, H. Lu, Y. Gao a, J. Xu, K. Huang, *J. Colloid Interf. Sci.* 2023, **639**, 292.
- [S28] A. Zhang, X. Yin, X. Zhang, J. Ba, J. Li, Y. Wei, Y. Wang, *ACS Appl. Energy Mater.* 2024, **7**, 1298.
